1     **DIFFERENTIAL IMPROVEMENTS BETWEEN MEN AND WOMEN IN REPEATED**  
2                                   **CROSSFIT® OPEN WORKOUTS**

3

4     Gerald T. Mangan<sup>1</sup>, Nina Grundlingh<sup>2</sup>, and Yuri Feito<sup>3</sup>

5

6     <sup>1</sup>Exercise Science and Sport Management, Kennesaw State University, Kennesaw, GA 30144

7     <sup>2</sup>Data Science and Analytics, Kennesaw State University, Kennesaw, GA 30144

8     <sup>3</sup>American College of Sports Medicine, Indianapolis, IN 46202

9

10    Running title: Sex differences in repeated CFO workouts

11

12    Corresponding Author:

13    Gerald T. Mangan<sup>1</sup>

14    1000 Chastain Rd, Kennesaw, GA, 30144, USA

15    Email address: [gmangan@kennesaw.edu](mailto:gmangan@kennesaw.edu)

16 **ABSTRACT**

17  
18 The CrossFit® Open (CFO) acts a preliminary round that qualifies men and women for later  
19 stages of its annual Games competition. The CFO typically consists of 4-6 workouts that  
20 variably challenge an athlete's weightlifting strength, gymnastic skill, and endurance capacity.  
21 Except for differences in prescribed intensity loads, workouts are designed the same for men and  
22 women to elicit a similar challenge. While all workouts within a single year are unique to each  
23 other, one has been repeated from a previous CFO each year between 2012 and 2021. Because  
24 previous CFO workouts are often integrated into training, improvements are expected when a  
25 workout is officially repeated. However, besides documented record performances, it is unclear  
26 whether most athletes are improving, if these improvements affect ranking, or if differences exist  
27 between men and women. **PURPOSE:** To examine sex differences and performance changes  
28 across repeated CFO workouts, as well as their effect on CFO and workout ranking.  
29 **METHODS:** Eleven separate samples of 500 men and 500 women, who were representative of  
30 the same overall percent rank within each year involving one of the nine repeated CFO workouts  
31 (2011-2021) were drawn for this study. Each athlete's age (18-54 years), rank (overall and within  
32 each workout), and reported workout scores were collected from the competition's publicly-  
33 available leaderboard. Each sample had excluded any athlete who had not met minimum  
34 performance criteria (e.g., at least one completed round) for all prescribed (Rx) workouts within  
35 a given year (including those not analyzed). Since some workouts could be scored as repetitions  
36 completed or time-to-completion (TTC), and because programming was often scaled between  
37 men and women, all scores were converted to a repetition completion rate (repetitions divided by  
38 TTC [in minutes]). **RESULTS:** Separate sex x time analyses of variance with repeated measures  
39 revealed significant ( $p < 0.05$ ) interactions in all but one (CFO 18.4 vs. 20.3) repeated workout  
40 comparison. Initially, men were faster in four workouts (~18.5%, range = 3.9 – 35.0%,  $p <$   
41 0.001), women in two (~7.1%, range = 5.2 – 9.0%,  $p < 0.001$ ), and they tied in the remaining  
42 three workouts. When these workouts were repeated in subsequent years, men were no longer  
43 faster in two workouts (CFO 11.1 to 14.1 and CFO 12.4 to 13.3) but became faster in another  
44 (CFO 16.4 to 17.4). In contrast, women were slower in CFO 14.2 and became faster than men  
45 when the workout repeated (CFO 15.2), but then performed CFO 19.2 slower than men, a  
46 workout they initially completed faster (CFO 16.2). Though performance improved in seven of  
47 the nine workouts (~14.3%,  $p < 0.001$ ) and percentile rank was controlled, athletes earned a  
48 lower rank (overall and within workout) on each repeated workout ( $p < 0.001$ ).  
49 **CONCLUSIONS:** Performance (measured as repetition completion rate) has improved in most  
50 repeated CFO workouts, particularly females. However, improvements seen among all athletes,  
51 along with increased participation, have made it more difficult for athletes to improve their  
52 overall rank. To rank higher, individual athlete must improve their pace to a greater degree than  
53 the average improvements seen across the competitive field.

54  
55 **KEYWORDS:** high-intensity functional training, athlete, competition, repetition completion rate,  
56 sport

57 **INTRODUCTION**

58

59 Developed in 2000, CrossFit® is a training strategy that incorporates a variety of

60 functional, multimodal movements into workouts meant to be performed at a relatively high-

61 intensity for the purpose of improving general physical preparedness (1-3). The strategy aims to

62 avoid forming any linear structure to its daily, weekly, and monthly programming, and instead,

63 constantly varies the stimulus to promote simultaneous and generalized improvements in fitness

64 (2). It became a sport in 2007 when the first CrossFit® Games competition was held on a ranch

65 in Aromas, California (3). Though it and the following year's competitions were open to anyone

66 who could travel to the ranch, the sport quickly grew in popularity, which necessitated the

67 introduction of preliminary, qualifying rounds. In 2011, the sport had grown so large that an

68 online, qualification round known as the CrossFit® Open (CFO) was introduced (3). It was

69 needed to reduce the initial participant pool of 26,000 to the top 60 athletes within 17 worldwide

70 regions, with the top 1 – 3 athletes from each region progressing to the Games. While several

71 changes to the competition's structure have been made since 2011 (3), the existence of the CFO

72 has remained. The 3 – 5-week CFO has typically consisted of 4 – 6 workouts that variably

73 challenge an athlete's weightlifting strength, gymnastic skill, and endurance capacity (4, 5). The

74 details of each workout are announced weekly, and competitors may rely on the fact that all

75 workouts within a particular year will be unique to each other. However, except for in 2011 and

76 2022, each CFO competition has included a workout drawn from a previous competition, with

77 nine distinct workouts acting as repeats between 2012 and 2021. Adapted from (4), the

78 composition and movement standards for these workouts are presented in Tables 1 and 2,

79 respectively.

### Sex differences in repeated CFO workouts 3

80 [INSERT TABLES 1 and 2 HERE]

81 Competitive success in CrossFit® is anecdotally thought to be dependent on an athlete's  
82 proficiency in each of the numerous potential exercises that may appear in workouts, and all  
83 associated physiological traits. This idea is supported by several studies reporting relationships  
84 between performance and most investigated physiological variables (6-12). While the collective  
85 findings of these studies may ultimately prove useful for developing generalized training  
86 recommendations, they all suffer from the same underlying assumption that the needs of  
87 CrossFit® athletes are static. Alongside and within some of these studies, it has also been  
88 suggested that the relevance of these traits may be modulated by the athlete's experience (7, 12-  
89 14). As one becomes more familiar with the physical tasks appearing in sport, they learn to  
90 activate more muscle when given the same tasks and eliminate inefficient and unnecessary  
91 actions (15-17). An experienced athlete would have had more opportunities to develop relevant  
92 skills and strategies that affect their approach to a workout (i.e., pacing strategy) and its resultant  
93 physiological demand. That is, the more experienced athlete might complete more work within a  
94 given duration because of a more effective pacing strategy. This is relevant to CrossFit®  
95 competition because workouts are commonly structured to produce a score that emphasizes  
96 maximal workout density (i.e., complete assigned work as fast as possible or complete as much  
97 work as possible within the assigned time) (1, 2). Athletes are routinely scored by either their  
98 time to complete (TTC) assigned work or their ability to complete 'as many repetitions as  
99 possible' (AMRAP) of assigned work within a specified time limit. After their introduction, CFO  
100 workouts become benchmarks (i.e., named workouts that are commonly known across training  
101 facilities) that may be integrated into training. It is reasonable to expect that greater familiarity  
102 with these workouts would lead to improved scores whenever one is officially repeated in

## Sex differences in repeated CFO workouts 4

103 competition (18, 19). However, aside from documented record performances from the sport's top  
104 athletes (4, 5), it is unclear whether this is true for the remaining competition pool. Further, the  
105 impact of increased participation on performance and ranking is also unknown and a worthy  
106 consideration.

107         The growth in female participation is another important consideration. The initial CFO  
108 pool of 26,000 athletes consisted of 4,506 women (34.3% of all athletes) and that number grew  
109 to 42,799 women in 2021 (36.7% of non-scaled or age-group athletes who completed all CFO  
110 workouts as prescribed) (20). Unlike more traditional sports, gender equity is purposely  
111 emphasized in CrossFit®. The same number of men and women compete together on teams, the  
112 same number are invited to the Games, the same fans are spectators at both competitions, and  
113 male and female winners receive the same amount of monetary compensation (21). The only  
114 observable difference between the male and female competitions are participation and  
115 programming. With programming, workouts are often scaled between sexes to account for  
116 known physiological differences and deliver a similar challenge (4, 5), though scaling practices  
117 do not appear to be uniformly prescribed and their effect on performance has not been  
118 specifically explored. Among repeated CFO workouts, weightlifting intensity loads were the  
119 most often scaled programming feature with female loads being prescribed at 62.2 – 73.3% of  
120 the loads prescribed to men, along with wall ball shot target distance (3.05 m versus 2.74 m) and  
121 box jump height (61 cm versus 51 cm) (4). While scaling resistance-based exercises may be  
122 assumed to account for known strength and power differences between men and women (22),  
123 those differences were not considered (i.e., scaled) with gymnastic-calisthenic exercise  
124 prescription (e.g., handstand push-ups/walking, burpees, pull-ups, and muscle-ups). It might be  
125 assumed that scaling was considered unnecessary for these movements because they primarily

## Sex differences in repeated CFO workouts 5

126 require the athlete to maneuver their own body mass about an object (e.g., pull-up bar, rings,  
127 box) (1, 2) and women tend to possess less body mass (22, 23); thus, equating the difficulty.  
128 Scaling was also not applied to jumping rope and rowing tasks, which seemingly does not  
129 account for known sex differences in physiological measures of cardiorespiratory fitness (22,  
130 24). It is unknown whether differences in programming have affected male and female CFO  
131 performance or if this has changed over time.

132 In non-CFO workouts, one study reported no differences between 13 men and 10 women  
133 for a 20-minute AMRAP that scaled rowing calories (men = 13, women = 11), deadlift loads  
134 (men = 62 kg, women = 44 kg), and kettlebell swing loads (men = 24 kg, women = 16 kg) but  
135 not burpees (25). Likewise, no differences were found in a TTC version of the same workout,  
136 where participants completed sufficient rounds to equate the total volume of the 20-minute  
137 AMRAP. However, experience (the only available proxy of athlete skill) was significantly  
138 different between sexes, which could have affected how each approached the workouts.  
139 Furthermore, the extremely small sample size limits the generalizability of these results to the  
140 overall CrossFit® population. More recently, normative scores were developed from very large  
141 random samples of CFO competitors ( $n = 7,046 - 89,792$ ) for all workouts programmed between  
142 2011 and 2022 (26), and sex differences were observed in 56 out of 60 total workouts. Although  
143 this implies CFO scaling between sexes has been ineffective (i.e., if scaling was properly  
144 applied, no differences should have been observed), any definitive conclusions would be  
145 premature at this time. The average sample for women was approximately 43.1% the size of the  
146 men's samples, and it cannot be assumed that participant skill was equated between each sex's  
147 sample on any given workout. Making comparisons between samples of equal size and equated  
148 skill would provide a better understanding about whether scaling practices have been effective

149 (or in need of change). In turn, this information would assist in the development of generalized  
150 training recommendations and provide better context for studies aiming to determine  
151 physiological predictors of performance. Thus, the purpose of this investigation was to begin that  
152 process by examining sex differences and performance changes across repeated CFO workouts  
153 in similarly-ranked (i.e., equated skill) athletes. A secondary aim of this study was to determine  
154 how changes in performance translated to ranking in each workout in each workout and the  
155 overall competition. Based on pilot work (26, 27), we hypothesized that men would perform  
156 better on more workouts, regardless of scaling, but both sexes would improve equally over time.  
157 Nevertheless, improved performance would not translate to a higher official CFO competition  
158 rank due to increased overall participation.

159

160

161

## METHODS

### 162 **Study design**

163 To determine sex differences and performance changes across repeated CFO workouts,  
164 performance data was collected for all athletes participating in CFO competitions from 2011 to  
165 2021. All competition results were obtained from the JSON file located on the publicly-  
166 available, official competition leaderboard (20). Since these data were pre-existing and publicly  
167 available, the Kennesaw State University's Institutional Review Board classified this study as  
168 exempt, and participants did not have to provide their informed consent. Python3 was used to  
169 convert the data into a CSV format and treated in Microsoft Excel (v. 365, Microsoft  
170 Corporation, Redmond, VA, USA). Treating the data involved removing all age-group athletes  
171 (e.g., teens and masters) and cases that did not meet study inclusion criteria. The retained data

## Sex differences in repeated CFO workouts 7

172 included each athlete's age and final overall ranking (i.e., official CFO rank awarded within a  
173 given year), as well as their official rank and score for each repeated CFO workout that they  
174 completed. Subsequently, differences were examined between sexes and repeated efforts.

### 175 **Participants**

176 Based on pilot data (27) and the expectation of a small effect (Effect of  $f = 0.10$ ), a priori  
177 analysis using G\*Power (v. 3.1.9.7, Heinrich-Heine-Universität, Germany) for a repeated-  
178 measures design indicated at least 328 participants would provide sufficient power ( $\alpha = 0.05$ ,  $\beta =$   
179  $0.95$ ) to observe differences between sexes and performances in each repeated CFO workout.  
180 Since collecting data on the same 328 men and women from 2011 to 2021 would produce a very  
181 specific sample, one that is likely representative of a subset of CFO participants, this study  
182 identified cases based on percent rank and made comparisons between athletes of the same  
183 percent rank across competition years.

184 Initially, a stratified list of 500 percentile ranks were identified based on the approximate  
185 percentage of cases that would fall within each standard deviation (SD) bin: 0.0 – 0.5 SD  
186 (38.2%,  $n = 192$ ), 0.5 – 1.0 SD (30.0%,  $n = 150$ ), 1.0 – 1.5 SD (18.4%,  $n = 92$ ), 1.5 – 2.0 SD  
187 (8.8%,  $n = 44$ ), 2.0 – 2.5 SD (3.4%,  $n = 16$ ), 2.5 – 3.0 SD (1.0%,  $n = 4$ ), and 3.0 – 3.5 SD (0.2%,  
188  $n = 2$ ) (28). Ranks were evenly divided within each bin and across each side of the mean (e.g., –  
189 2.75 SD, –2.5 SD, +2.5 SD, and +2.75 SD). These percent ranks would be used to identify the  
190 specific cases within each CFO year that would be drawn from the pool of athletes who also met  
191 study criteria. Age, rank, and performance data were retained for all athletes, between the ages of  
192 18 and 54 years (i.e., non-age group athletes), who completed all CFO workouts as prescribed  
193 (i.e., as Rx with no within-sex scaling) within a specific competition year. Additionally, cases  
194 were excluded if they did not complete at least one round (in AMRAP-style workouts), the first



## Sex differences in repeated CFO workouts 8

195 exercise couplet (in repeated couplet workouts), or all repetitions assigned for the first exercise  
196 (for TTC or when multiple rounds were not expected) for every workout within a single  
197 competition year. These criteria were meant to limit the inclusion of workout “specialists” and  
198 those who did not intend on completing or could not perform the exercises for the Rx workout.  
199 To match specific cases with the identified percent ranks to be drawn from within each year’s  
200 athlete pool, retained athletes were ordered based on their final within-sex overall competition  
201 rank and then assigned a within-year percent rank (i.e., percent rank among athletes meeting  
202 study criteria). The final within-year percent ranking was used to identify 500 athletes within  
203 each year who would be included in this study. Thus, the same array of percent ranks was  
204 represented by the athletes retained on each year. Table 3 provides a summary of the initial pool  
205 of competitors for each year, the number of cases meeting study criteria, and the age and final  
206 competition ranking characteristics of those retained for analysis.

207 [INSERT TABLE 3 HERE]

### 208 **Workout descriptions**

209 The specific programming details for each workout included in this study are provided in  
210 Tables 1 and 2. During CFO competition, workouts were individually released on each week of  
211 the competition, and athletes have predominantly been given four days to submit their best score  
212 to competition officials (e.g., Thursday evening to Monday evening). To be recognized as valid,  
213 any submitted attempt must have either been completed at a CrossFit® affiliate in front of a  
214 judge who passed the online Judge’s Course, or filmed using standardized criteria (5). Once a  
215 submission period ends, competition officials review and certify attempts, and award each a final  
216 rank and points. Because all data was collected from the official competition leaderboard (20),  
217 this study assumed that all workout criteria and movement standards had been met and verified

218 by competition officials. The data retained for analysis included the athlete's official rank for  
219 each workout and score, recorded as TTC or repetitions. For uniformity and to enable fair  
220 comparisons when a workout's official score could be stated as TTC or repetitions completed  
221 (i.e., when a TTC workout had a time limit to complete all work), all workout scores were  
222 converted into a repetition completion rate (i.e., repetitions completed divided by TTC or  
223 workout duration; repetitions  $\square$  minute<sup>-1</sup>), as previously described (29). Regardless of the specific  
224 workout's scoring format, a greater repetition completion rate would always indicate a better  
225 competition score. This metric was also used to calculate each athlete's percent rank within each  
226 workout.

227

## 228 **Statistical Analysis**

229 Initially, the assumption of normal distribution was verified by the Shapiro-Wilk test.  
230 Subsequently, separate two-tailed, two-way (Time x Sex) analyses of variance with repeated  
231 measures were performed for each repeated CFO workout comparison. Dependent variables  
232 included age and original overall rank (within each year) and original workout rank, calculated  
233 percent rank, and repetition completion rate. Except for the instance when a CFO workout was  
234 repeated twice (i.e., 11.6 vs. 12.5 vs. 18.5), sphericity was assumed for all repeated workout  
235 comparisons. For the exception, the Greenhouse-Geisser correction was applied because  
236 sphericity was violated on each comparison. All significant main effects and interactions were  
237 further assessed by pairwise comparisons using the Bonferroni adjustment. Effect sizes ( $\eta^2_p$ :  
238 Partial eta squared) were also used to quantify the magnitude of any observed differences (30).  
239 Interpretations of effect size were evaluated at the following levels: small effect (0.01-0.058),  
240 medium effect (0.059-0.137) and large effect (> 0.138). All statistical analyses were performed

## Sex differences in repeated CFO workouts 10

241 using SPSS (v. 28.0, SPSS Inc., Chicago, IL). Significance was accepted at an alpha level of  $p \leq$   
242 0.05, and all data are reported as mean  $\pm$  SD.

243

## 244 **RESULTS**

### 245 **Ranking and athlete age**

246 No differences were seen in the workout percent rank calculated for each repeated  
247 workout within each comparison, except for a main effect for sex when comparing 12.4 and 13.3  
248 ( $F = 17, p < 0.001, \eta^2_p = 0.02$ ). , Percent workout rank was greater in men ( $29.8 \pm 27.1\%$ ) than  
249 women ( $27.1 \pm 23.5\%$ ) during the workout's original and repeated appearances. In contrast,  
250 significant time x sex interactions ( $F = 14 - 1089, p < 0.001, \eta^2_p = 0.01 - 0.52$ ) were noted with  
251 original overall rank for each workout comparison. In each comparison, men ranked lower  
252 within their division than women, and ranking further declined whenever a CFO workout was  
253 repeated. Likewise, the original rank assigned for performance in each workout followed a  
254 similar pattern in each comparison.

255 Significant time x sex interactions were only found in the comparisons between 11.1 and  
256 14.1 ( $F = 4, p = 0.034, \eta^2_p < 0.01$ ) and between 11.6, 12.5, and 18.5 ( $F = 3, p = 0.041, \eta^2_p <$   
257  $0.01$ ). Average age in men increased from 2011 to 2012 (+1.1 years,  $p = 0.015$ ), from 2011 to  
258 2014 (+ 2.0 years,  $p < 0.001$ ), and from 2012 to 2018 (+1.8 years,  $p < 0.001$ ), but only from 2011  
259 to 2018 in women (+1.5 years,  $p < 0.001$ ). Main effects for time, where age increased in  
260 subsequent years, were noted in all remaining comparisons except for between 14.5 and 16.5 ( $p$   
261  $= 0.053$ ). Main effects for sex were also noted with the comparisons between 14.2 and 15.2 ( $F =$   
262  $9, p = 0.003, \eta^2_p = < 0.01$ ), 14.5 and 16.5 ( $F = 5, p = 0.023, \eta^2_p < 0.01$ ), and 16.2 and 19.2 ( $F = 6,$   
263  $p = 0.013, \eta^2_p < 0.01$ ), where men were older than women in each case. Comparisons between

264 sexes across repeated CFO workouts for age, overall rank, workout rank, and workout percentile  
265 rank are presented in Table 4.

266 [INSERT TABLE 4 HERE]

### 267 **Workout completion rate**

268 Significant time x sex interactions ( $F = 14 - 357, p < 0.001, \eta^2_p = 0.01 - 0.26$ ) were  
269 observed for all workout completion rate comparisons except for between 18.4 and 20.3, where  
270 no differences were found between sexes or repeated performance. Comparisons between sexes  
271 and across repeated CFO workouts for repetition completion rate are illustrated in Figure 1.

272 [INSERT FIGURE 1 HERE]

273 *11.1 vs. 14.1*

274 Though men completed 11.1 at a faster rate than women (+2.5 repetitions  $\square$  minute<sup>-1</sup>,  $p <$   
275 0.001), no differences were seen in 14.1. In 2014, women improved repetition completion rate  
276 (+4.0%,  $p < 0.001$ ), while men declined (-4.4%,  $p < 0.001$ ).

277

278 *11.6 vs. 12.5 vs. 18.5*

279 Men completed the workout faster than women in each year (0.6 – 2.5 repetitions  $\square$   
280 minute<sup>-1</sup>,  $p < 0.001$ ). However, compared to 2011, their performance declined in 2012 (-3.0%,  $p$   
281 = 0.002) before improving by 8.4% in 2018 ( $p < 0.001$ ). Women remained steady from 2011 to  
282 2012 before improving in 2018 (+28.4%,  $p < 0.001$ ).

283

284

285

286

## Sex differences in repeated CFO workouts 12

287 *12.4 vs. 13.3*

288 Men completed 12.4 at a faster rate than women (0.7 repetitions  $\square$  minute<sup>-1</sup>,  $p < 0.001$ )

289 but not 13.3 ( $p = 0.703$ ). In 2013, women improved their repetition completion rate by 0.5

290 repetitions  $\square$  minute<sup>-1</sup>,  $p < 0.001$ ) and men slowed by 0.1 repetitions  $\square$  minute<sup>-1</sup> ( $p < 0.001$ ).

291

292 *14.2 vs. 15.2*

293 Men completed 14.2 at a faster rate than women (1.4 repetitions  $\square$  minute<sup>-1</sup>,  $p < 0.001$ )

294 but slowed for 15.2 by 0.2 repetitions  $\square$  minute<sup>-1</sup> ( $p < 0.024$ ). Women improved their repetition

295 completion rate for 15.2 by 1.9 repetitions  $\square$  minute<sup>-1</sup> ( $p < 0.001$ ) and exceeded the pace in men

296 by 0.4 repetitions  $\square$  minute<sup>-1</sup> ( $p = 0.004$ ).

297

298 *14.5 vs. 16.5*

299 Compared to men, a faster repetition completion rate was seen in women for both 14.5

300 (0.5 repetitions  $\square$  minute<sup>-1</sup>,  $p < 0.001$ ) and 16.5 (0.8 repetitions  $\square$  minute<sup>-1</sup>,  $p < 0.001$ ), with both

301 men (1.6 repetitions  $\square$  minute<sup>-1</sup>,  $p < 0.001$ ) and women (1.9 repetitions  $\square$  minute<sup>-1</sup>,  $p < 0.001$ )

302 improving their speed from 2014 to 2016.

303

304 *16.2 vs. 19.2*

305 A faster repetition completion rate was seen in women for 16.2 (0.9 repetitions  $\square$  minute<sup>-1</sup>,

306  $p < 0.001$ ) but not 19.2 ( $p = 0.360$ ). Though men performed 19.2 at a slower pace (-1.2

307 repetitions  $\square$  minute<sup>-1</sup>,  $p < 0.001$ ), women experienced a greater decline (-2.0 repetitions  $\square$

308 minute<sup>-1</sup>,  $p < 0.001$ ).

309

## Sex differences in repeated CFO workouts 13

310 *16.4 vs. 17.4*

311 No differences in repetition completion rate were noted between men and women for  
312 16.4 ( $p = 0.680$ ). In 2017, men completed 17.4 at a faster rate than women (0.2 repetitions  $\square$   
313  $\text{minute}^{-1}$ ,  $p < 0.047$ ), but this was due to men slowing down less ( $-0.3$  repetitions  $\square$   $\text{minute}^{-1}$ ,  $p <$   
314  $0.001$ ) than women ( $-0.6$  repetitions  $\square$   $\text{minute}^{-1}$ ,  $p < 0.001$ ).

315

316 *17.1 vs. 21.2*

317 No differences in repetition completion rate were noted between men and women for  
318 17.1 ( $p = 0.441$ ). In 2021, men completed 21.2 at a faster rate than women (2.0 repetitions  $\square$   
319  $\text{minute}^{-1}$ ,  $p < 0.047$ ), and this was due to men improving their pace by 2.6 repetitions  $\square$   $\text{minute}^{-1}$   
320 ( $p < 0.001$ ) compared to the 0.5 repetitions  $\square$   $\text{minute}^{-1}$  improvement ( $p < 0.001$ ) seen in women.

321

322

### DISCUSSION

323 This study examined performance changes in repeated CFO workouts and investigated  
324 whether men and women performed differently across time. A secondary aim was to determine  
325 how changes in performance affected competition ranking. The data indicated that out of nine  
326 separate repeated CFO workouts, repetition completion rate improved in five, slowed in two, and  
327 in one, remained the same (i.e., the 9-minute AMRAP programmed for 18.4 and 20.3). Though  
328 pace generally improved over time, the overall rank awarded declined. An outcome most likely  
329 due to increased participation over time because neither overall nor workout percent rank  
330 changed. Nevertheless, to achieve a comparable or better rank in a repeated CFO workout,  
331 athletes had to improve performance beyond what was typically seen across all competitors.  
332 Additionally, initial, and subsequent performances were not equal among men and women. Men

## Sex differences in repeated CFO workouts 14

333 were initially faster in four of the workouts, while women outpaced men in two workouts, and  
334 tied in the remaining three. Men still demonstrated a faster pace in more workouts when they  
335 were repeated (3 workouts versus 2 workouts), but the specific combinations of workouts where  
336 they were faster differed slightly. Men and women tied on the second iteration of two workouts  
337 where men were initially faster and were slower than women in a third workout where they had  
338 initially been faster. Women also tied men on the second iteration of a workout where they were  
339 initially faster.. Aside from a preliminary conference presentation (27), this is the first study to  
340 investigate performance changes in official CrossFit® competition workouts.

341 Improved performance was observed in six of the nine repeated CFO workouts. A  
342 learning effect would seem to be the most likely explanation for these improvements. During the  
343 CFO, athletes are given a 4-day window to submit their best score after each workout's release  
344 (5). A better score is accomplished by employing the fastest sustainable (for the duration of the  
345 workout) pace that simultaneously manages fatigue and maximizes workout density (i.e.,  
346 repetitions  $\square$  minute<sup>-1</sup>) (29). Since each CFO workout is novel (except for those examined in this  
347 study) (4, 5), finding one's optimal pace within four days may be difficult. Ideally, athletes  
348 would reconcile their physiological and skill-related abilities with a workout's exercise  
349 complexity, relative intensity, workload requirements, and structural design (i.e., AMRAP, TTC)  
350 on their first attempt. Though experience may facilitate this process (7, 12-14), each workout  
351 presents a unique set of conditions that might necessitate multiple attempts to find an optimal  
352 pace. Each additional workout (or attempt) would contribute to accumulated fatigue and damage  
353 that might not diminish within the submission window (31), and this could negatively impact  
354 effort on subsequent attempts. Therefore, it is possible for athletes to not find their ideal pacing  
355 strategy for each workout within a single CFO competition. However, after their introduction,

## Sex differences in repeated CFO workouts 15

356 CFO workouts may be integrated into training and/or frequently discussed (in-person or online)  
357 amongst athletes. With an average of 2.4 years separating repeated CFO workouts (18, 19),  
358 athletes have ample opportunities to refine their pacing strategy. Albeit they would not know  
359 which and when specific CFO workouts might be repeated, leaving an ever-growing list of  
360 potential workouts in need of practice.

361       Having time to perfect pacing strategy may have been less relevant to performance in the  
362 three workouts that did not improve (i.e., 16.2 – 19.2, 16.4 – 17.4, and 18.4 – 20.3). Compared to  
363 all other workouts, these three required more strength and capacity to lift heavier loads or  
364 perform complex gymnastic movements for multiple repetitions. For instance, deadlift loads  
365 ranged from 225 – 315 lbs. (102.1 – 142.9 kg) for men and 155 – 205 lbs. (70.3 – 93.0 kg) for  
366 women, and power clean loads ranged from 135 – 315 lbs. (61.2 – 142.9 kg) for men and 85 –  
367 205 lbs. (38.6 – 93.0 kg) for women. Further, these heavier loads were always paired with one or  
368 more gymnastics-calisthenic movements prescribed for multiple repetitions (e.g., 25 toes-to-bar,  
369 50 double-unders, 45 – 55 handstand push-ups, and 150 feet [45.7 m] of handstand walking). In  
370 contrast, the highest load required in all other workouts was for thrusters (men: 100 lbs. [45.4  
371 kg]; women: 65 lbs. [29.5 kg]), and these were typically paired with low-complexity calisthenics  
372 (e.g., burpees, burpee box jumps, and double-unders) prescribed at noticeably less volume. The  
373 only instance where gymnastics prescription was comparable involved 30 muscle ups (i.e., 12.4  
374 – 13.3), and the average athlete did not even complete a full round of this workout. While  
375 modifying pacing would seem to have a more immediate effect on these latter workouts,  
376 improving upon the former would have required more time to develop strength and strength  
377 endurance, as well as acquire or improve upon relevant gymnastic skills (32-34). On average,



## Sex differences in repeated CFO workouts 16

378 athletes had less time to work on relevant skills for these three repeated workouts (2.0 years)  
379 compared to the other workouts (2.6 years).

380 An alternate hypothesis for explaining the observed changes in performance might  
381 involve the relative growth of the sport. Compared to the first CFO in 2011, the number of  
382 athletes meeting this study's criteria increased 156 – 1305% and 168 – 1138% for women and  
383 men, respectively. Men peaked in 2019, while participation in women peaked in 2021. Similar  
384 trends were noted for all participating athletes (i.e., including scaled and age-group divisions).  
385 The competitive aspect about CrossFit® has been identified as a highly influential factor for  
386 participation and retention (35). However, little is known about the athletic and physical activity  
387 backgrounds among pre-existing and newly-introduced CFO participants. In a 2016  
388 epidemiological survey of Brazilian CrossFit® athletes (36), only 6.2% of respondents stated  
389 they had no sports experience prior to starting CrossFit®. Rather, 70.5% reported being  
390 physically active on > 3 days per week doing a variety of activities (i.e., weight training [72.1%],  
391 running [36.9%], soccer [19.2%], and martial arts [18.3%]), and most (67.0%) had been doing  
392 this for more than 3 years. Skills learned and developed across various sports and levels of  
393 competition are well known to have value to an athlete's primary sport (16, 17). It is possible  
394 that improved CFO performance may at least be partially due to newcomers being drawn from  
395 other sports and already possessing aptitude in many of the skills and traits needed for success.  
396 An intentional examination into the development of relevant skills, and whether they were  
397 obtained prior to or during CrossFit® training, would provide greater insight into the factors  
398 responsible for the growth of this sport.

399 The factors responsible for the growth in CFO participation may also be relevant to the  
400 differences seen between men and women. In 2011, women accounted for 34.3% of all

## Sex differences in repeated CFO workouts 17

401 competitors (or 30.2% of competitors meeting this study's criteria). Out of all the instances  
402 where men outpaced women, half ( $n = 4$ ) were seen during initial or repeated CFO workouts  
403 appearing within the competition's first two years (i.e., 11.1, 11.6, 12.4, and 12.5). Since 2011,  
404 the percentage of competitors who were women increased by 0.8% per year; a 0.3% increase per  
405 year out of competitors who met this study's criteria. Concomitantly, an equal number of  
406 instances (initial and repeated) where a performance advantage was observed either for men ( $n =$   
407  $4$ ) or women ( $n = 4$ ) were seen during this time. No advantages were observed in all other  
408 instances ( $n = 7$ ). Moreover, out of the four workouts where men initially held an advantage,  
409 women either eliminated (12.4 – 13.3 and 11.1 – 14.1) or claimed the advantage (14.2 to 15.2).  
410 Thus, female CFO participation is clearly increasing, and women appear to be experiencing  
411 greater improvements. Indeed, average performance improvement across all workouts was 8.3%  
412 for women compared to 2.8% in men. The driving force(s) behind these improvements is/are not  
413 well understood. It is possible that this observation is a simple mathematical function where  
414 lower values do not require dramatic additions in absolute numbers to experience larger percent  
415 increases. The potential lure of CrossFit® and competition may have also drawn women with  
416 athletic backgrounds to the overall athlete pool. That said, men appear to place more importance  
417 on the competitive aspects of CrossFit® (37) whereas women seem to more commonly be drawn  
418 by the social and health (physical and mental) related benefits (37, 38). Instead, it may be  
419 speculated that increased female participation and performance are more closely related to a  
420 growing realization that this sport empowers women unlike more traditional sports and physical  
421 activity settings (39, 40). That in many cases, women can perform as good or better than men.

422         The presence and adequacy of program scaling are the caveats to the observed sex  
423 differences on pacing. There appears to be an emphasis placed on scaling workout characteristics

## Sex differences in repeated CFO workouts 18

424 (4, 5), and this is presumably meant to acknowledge known physiological differences and elicit a  
425 similar challenge to both men and women (4, 5, 21). If applied correctly, significant differences  
426 in repetition completion rate should not exist. However, performance differences were noted, as  
427 were inconsistencies with scaling application across exercise types. For example, resistance  
428 training loads, wall ball shot medicine ball weight and target distance, and box jump height were  
429 all scaled, but not gymnastic and calisthenic movements (e.g., chest-to-bar pull-ups, handstand  
430 push-ups, handstand walking, burpees, rope jumping), continuous exercise patterns (referred to  
431 as monostructural; e.g., rowing), or programming durations. Although scaled loads might  
432 account for strength differences (22), their arbitrary prescription (i.e., loads assigned to women  
433 were 67.1% [range = 62.2 – 73.3%] less than those assigned to men) assumes a specific strength  
434 difference that cannot be known across thousands of competitors. Likewise, it seems that known  
435 differences in body mass (23) provide the basis for why gymnastics and calisthenics are not  
436 scaled, but this rationale fails to account for known upper-body strength differences (22) relevant  
437 to several exercises. Finally, the potential sex differences with aerobic and anaerobic capacity  
438 (22, 24) are not addressed by scaling continuous exercises or workout durations. Thus, it can be  
439 concluded that scaling was not adequately applied across all CFO workouts. That said, the  
440 present study limited its focus to repeated CFO workouts, not all CFO or competition workouts.  
441 It was not adequately designed to make definitive conclusions scaling adequacy. Nevertheless,  
442 our findings on sex differences in programming and performance warrant further investigation.

443 The present study's findings are not without limitations. Competition rule and structure  
444 changes (e.g., specific days allotted to submit scores, number of workouts, submission card  
445 details), as well as variations in when each workout iteration appeared (e.g., 18.4 appeared on  
446 week 4 of 2018, whereas 20.3 occurred on week 3 of 2020), and the number of attempts

## Sex differences in repeated CFO workouts 19

447 individual athletes made before submitting their best score, have all affected the exact context  
448 though which each workout was performed. Nevertheless, these are unavoidable variations that  
449 are consistent with the training strategy (2) but should still be kept in mind when interpreting  
450 these results. Another limitation involved purposeful, stratified selection of cases based on  
451 percent rank to make fair comparisons between sexes and repeated performances. The non-  
452 random stratification was done to best approximate a normally-distributed population (28) and  
453 since repeated performances were not followed in a random sample of the same exact athletes, it  
454 is possible that individual differences and variances in age and relevant physical, physiological,  
455 and psychological traits influenced the analyzed scores (6-14). However, given the growth in  
456 CFO participation, it would not have been possible to follow a sufficient sample of the same  
457 athletes over a decade of competitions. Even if it were, that sample might be more accurately  
458 representative of a specific subset of more experienced CFO athletes, rather than a more  
459 heterogenous representation of typical CFO athlete experience. Conversely, the opposite  
460 rationale underpinned this study's exclusion criteria. Cases were excluded if the athlete did not  
461 earn a score beyond a minimum threshold assigned to each CFO workout of a specific year.  
462 These measures were meant to ensure that our findings were representative of a homogenous  
463 sample of healthy (i.e., those that did not miss a workout due to injury), well-rounded (i.e., non-  
464 workout specialists or those attempting to boost their rank by only completing a small number of  
465 repetitions in a specific workout) CrossFit® athletes. But in doing so, it is possible that  
466 representative, low-ranking cases were eliminated, and this could have slightly skewed our  
467 results. Finally, the validity of the extracted scores is ultimately reliant on determinations made  
468 by CFO competition officials (5). As these cannot be verified, it is possible that the analyzed  
469 scores included errors in reporting, individual variation in meeting exercise movement standards,

## Sex differences in repeated CFO workouts 20

470 and outright cheating. Still, the conservative approach in estimating expected sample  
471 requirements for sufficient statistical power, and then exceeding the minimum sample size  
472 should have limited the impact of these limitations on our results.

473         The findings of this study suggest that performance (measured as repetition completion  
474 rate) in most repeated CFO workouts, particularly females, has improved since the competition's  
475 inception. These data serve as initial documentation that, though often scaled, men and women  
476 scored differently in ~63.2% of workouts. These differences warrant a more in-depth look across  
477 a broader range of workouts, and more specifically, how they might affect acute and long-term  
478 physiological responses. Doing so, might help guide more effective, sex-equated scaling  
479 practices. From a competitive standpoint, the general improvements seen among athletes, along  
480 with increased participation, have made it more difficult for athletes to improve their overall  
481 rank. Athletes might maintain their percent rank but drop in overall ranking even if they  
482 complete repeated workouts at a faster rate. In this regard, maintaining one's overall rank across  
483 iterations of a workout should be viewed as a positive outcome, as it would imply greater  
484 improvements compared to the average competitor. Ranking higher appears to require the  
485 individual athlete to improve their pacing to an even greater degree than the remainder of the  
486 competitive field. Athletes and coaches are advised to maintain perspective when identifying  
487 areas in need of attention, and to focus on finding suitable pacing strategies that balance  
488 efficiency with physiological attributes when attempting to improve performance in specific  
489 workouts.

490

## REFERENCES

- 491 1. Feito Y, Heinrich K, Butcher S, Poston W. High-Intensity Functional Training (HIFT):  
492 Definition and Research Implications for Improved Fitness. *Sports*. 2018;6(3):76.
- 493 2. Glassman G. CrossFit training guide level 1.: The CrossFit Journal; 2011.
- 494 3. CrossFit. Finding the Fittest on Earth. CrossFit Games [Internet]. 2022 September 15,  
495 2022. Available from: <https://games.crossfit.com/history-of-the-games>.
- 496 4. CrossFit. Open Workouts. CrossFit Games [Internet]. 2021; (August 31). Available from:  
497 <https://games.crossfit.com/workouts/open/2021>.
- 498 5. CrossFit. Games Competition Rulebook: The CrossFit Journal; 2022.
- 499 6. Butcher SJ, Neyedly TJ, Horvey KJ, Benko CR. Do physiological measures predict selected  
500 CrossFit® benchmark performance? *Open Access Journal of Sports Medicine*. 2015;6:241.
- 501 7. Bellar D, Hatchett A, Judge L, Breaux M, Marcus L. The relationship of aerobic capacity,  
502 anaerobic peak power and experience to performance in CrossFit exercise. *Biol Sport*.  
503 2015;32(4):315-20.
- 504 8. Feito Y, Giardina MJ, Butcher S, Mangine GT. Repeated anaerobic tests predict  
505 performance among a group of advanced CrossFit-trained athletes. *Applied Physiology,*  
506 *Nutrition, and Metabolism*. 2018;44(7):727-35.
- 507 9. Dexheimer JD, Schroeder ET, Sawyer BJ, Pettitt RW, Aguinaldo AL, Torrence WA.  
508 Physiological Performance Measures as Indicators of CrossFit® Performance. *Sports*.  
509 2019;7(4):93.
- 510 10. Zeitz EK, Cook LF, Dexheimer JD, Lemez S, Leyva WD, Terbio IY, et al. The relationship  
511 between Crossfit® performance and laboratory-based measurements of fitness. *Sports*.  
512 2020;8(8):112.
- 513 11. Carreker JDD, Grosicki GJ. Physiological predictors of performance on the CrossFit®  
514 “Murph” challenge. *Sports*. 2020;8(7):92.
- 515 12. Mangine GT, Tankersley JE, McDougale JM, Velazquez N, Roberts MD, Esmat TA, et al.  
516 Predictors of CrossFit Open performance. *Sports*. 2020;8(7):102.
- 517 13. Mangine GT, McDougale JM. CrossFit® open performance is affected by the nature of  
518 past competition experiences. *BMC Sports Science, Medicine and Rehabilitation*. 2022;14(1):1-  
519 15.
- 520 14. Mangine GT, Mcdougale JM, Feito Y. Relationships Between Body Composition and"  
521 Fran" Performance are Modulated by Competition Class and Skill. *Front Physiol*. 2022:969.
- 522 15. Krakauer JW, Hadjiosif AM, Xu J, Wong AL, Haith AM. Motor Learning. *Comprehensive*  
523 *Physiology*. 2019;9(2):613-63.
- 524 16. Brenner JS. Sports specialization and intensive training in young athletes. *Pediatrics*.  
525 2016;138(3).
- 526 17. Myer GD, Jayanthi N, DiFiori JP, Faigenbaum AD, Kiefer AW, Logerstedt D, et al. Sports  
527 specialization, part II: alternative solutions to early sport specialization in youth athletes. *Sports*  
528 *Health*. 2016;8(1):65-73.
- 529 18. Micklewright D, Parry D, Robinson T, Deacon G, Renfree A, St Clair Gibson A, et al. Risk  
530 perception influences athletic pacing strategy. *Med Sci Sports Exerc*. 2015;47(5):1026-37.
- 531 19. Santalla A, Naranjo J, Terrados N. Muscle efficiency improves over time in world-class  
532 cyclists. *Med Sci Sports Exerc*. 2009;41(5):1096-101.

- 533 20. Leaderboard. Leaderboard 2021 [Available from: <http://games.crossfit.com/leaderboard>.  
534 21. Laxton K. Closing the gender gap - Empowering women in sport. CrossFit Journal  
535 [Internet]. 2022 September 15, 2022. Available from:  
536 <https://games.crossfit.com/article/closing-gender-gap-how-crossfit-empowers-women-spor>.  
537 22. Sandbakk Ø, Solli GS, Holmberg H-C. Sex differences in world-record performance: the  
538 influence of sport discipline and competition duration. *Int J Sports Physiol Perform*.  
539 2018;13(1):2-8.  
540 23. Huebner M, Perperoglou A. Sex differences and impact of body mass on performance  
541 from childhood to senior athletes in Olympic weightlifting. *PLoS One*. 2020;15(9):e0238369.  
542 24. Hunter SK. The relevance of sex differences in performance fatigability. *Med Sci Sports*  
543 *Exerc*. 2016;48(11):2247.  
544 25. Toledo R, Dias MR, Toledo R, Erotides R, Pinto DS, Reis VM, et al. Comparison of  
545 Physiological Responses and Training Load between Different CrossFit® Workouts with  
546 Equalized Volume in Men and Women. *Life*. 2021;11(6):586.  
547 26. Mangan GT, Grundlingh N, Feito Y. Normative Scores for CrossFit® Open Workouts:  
548 2011–2022. *Sports*. 2023;11(2):24.  
549 27. Mangan GT, editor Sex differences and performance changes over time in a repeated  
550 fitness competition workout containing thrusters and chest-to-bar pull-ups. National Strength &  
551 Conditioning Association National Conference; 2022; New Orleans, LA.  
552 28. Weir JP, Vincent WJ. The Normal Curve. *Statistics in Kinesiology*. 5th ed. Champaign, IL:  
553 Human Kinetics; 2021. p. 55-65.  
554 29. Mangan GT, Feito Y, Tankersley JE, McDougale JM, Kliszczewicz BM. Workout Pacing  
555 Predictors of Crossfit Open Performance: A Pilot Study. *Journal of Human Kinetics*.  
556 2021;78(1):89-100.  
557 30. Cohen J. *Statistical Power Analysis for the Behavioral Sciences*. Routledge. 1988:284-8.  
558 31. Tibana RA, Prestes J, NMF DES, VC DES, O DETN, Baffi M, et al. Time-Course of Changes  
559 in Physiological, Psychological, and Performance Markers following a Functional-Fitness  
560 Competition. *International Journal of Exercise Science*. 2019;12(3):904-18.  
561 32. Gulbin J, Weissensteiner J, Oldenzel K, Gagné F. Patterns of performance development  
562 in elite athletes. *European journal of sport science*. 2013;13(6):605-14.  
563 33. Ikezoe T, Kobayashi T, Nakamura M, Ichihashi N. Effects of Low-Load, Higher-Repetition  
564 vs. High-Load, Lower-Repetition Resistance Training Not Performed to Failure on Muscle  
565 Strength, Mass, and Echo Intensity in Healthy Young Men: A Time-Course Study. *The Journal of*  
566 *Strength & Conditioning Research*. 2020;34(12):3439-45.  
567 34. Shemmell J, Tresilian JR, Riek S, Carson RG. Musculoskeletal constraints on the  
568 acquisition of motor skills. *Skill Acquisition in Sport: Routledge*; 2004. p. 414-32.  
569 35. Fisher J, Sales A, Carlson L, Steele J. A comparison of the motivational factors between  
570 CrossFit participants and other resistance exercise modalities: a pilot study. *J Sports Med Phys*  
571 *Fitness*. 2017;57(9):1227-34.  
572 36. Sprey JW, Ferreira T, de Lima MV, Duarte Jr A, Jorge PB, Santili C. An epidemiological  
573 profile of CrossFit athletes in Brazil. *Orthopaedic journal of sports medicine*.  
574 2016;4(8):2325967116663706.  
575 37. Bycura D, Feito Y, Prather C. Motivational factors in CrossFit® training participation.  
576 *Health Behavior and Policy Review*. 2017;4(6):539-50.



## Sex differences in repeated CFO workouts 23

- 577 38. Coyne P, Woodruff SJ. Examining the influence of CrossFit participation on body image,  
578 self-esteem, and eating behaviours among women. *Journal of Physical Education and Sport*.  
579 2020;20(3):1314-25.
- 580 39. Schrijnder S, van Amsterdam N, McLachlan F. 'These chicks go just as hard as us!' (Un)  
581 doing gender in a Dutch CrossFit gym. *International Review for the Sociology of Sport*.  
582 2021;56(3):382-98.
- 583 40. Washington MS, Economides M. Strong is the new sexy: Women, CrossFit, and the  
584 postfeminist ideal. *Journal of Sport and Social Issues*. 2016;40(2):143-61.  
585

586



587 **FIGURE LEGEND**

588 **Figure 1. Repeated workout comparisons for repetition completion rate.**

589 Note: \* = Significant ( $p < 0.05$ ) difference between men and women; # = Significant ( $p < 0.05$ )

590 difference from previous year(s).

591 **Table 1. Repeated CrossFit® Open Workouts**

| Duration                               | Details                                                                                                                                                                                                                                  | Appearances (scoring)     |                           |                       |
|----------------------------------------|------------------------------------------------------------------------------------------------------------------------------------------------------------------------------------------------------------------------------------------|---------------------------|---------------------------|-----------------------|
| 10-minute AMRAP                        | 30 x Double-unders<br>15 x Power snatches (75lbs / 55lbs)                                                                                                                                                                                | 11.1<br>(repetitions)     | 14.1<br>(repetitions)     |                       |
| 7-minute AMRAP                         | 3 x Thrusters (100lbs / 65lbs)<br>3 x Chest-to-bar pull-ups<br><i>*Add 3 repetitions after each completed round</i>                                                                                                                      | 11.6<br>(repetitions)     | 12.5<br>(repetitions)     | 18.5<br>(repetitions) |
| 12-minute AMRAP                        | 150 x Wall ball shots (20lbs / 14lbs to 10' / 9' target)<br>90 x Double-unders<br>30 x Muscle-ups                                                                                                                                        | 12.4<br>(repetitions)     | 13.3<br>(repetitions)     |                       |
| 3-minute rounds<br>(indefinite)        | <i>Complete two sets of:</i><br>10 x Overhead squats (95lbs / 65lbs)<br>10 x Chest-to-bar pull-ups<br><i>*Add 3 minutes and 2 repetitions for each completed round</i>                                                                   | 14.2<br>(repetitions)     | 15.2<br>(repetitions)     |                       |
| TTC                                    | <i>21-18-15-12-9-6-3 repetitions of:</i><br>Thrusters (95lbs / 65lbs)<br>Bar-facing burpees                                                                                                                                              | 14.5 (TTC)                | 16.5 (TTC)                |                       |
| 4-minute rounds (20-minute time limit) | 25 x Toes-to-bar<br>50 x Double-unders<br>Squat cleans (R1: 135lbs / 85lbs x 15; R2: 185lbs / 115lbs x 13; R3: 225lbs / 145lbs x 11; R4: 275lbs / 175lbs x 9; R5: 315lbs / 205lbs x 7)<br><i>*Add 4 minutes for each completed round</i> | 16.2 (TTC or repetitions) | 19.2 (TTC or repetitions) |                       |
| 13-minute AMRAP                        | 55 x Deadlifts (225lbs / 155lbs)<br>55 x Wall ball shots (20lbs / 14lbs to 10' / 9')<br>55 x Calorie rowing<br>55 x Handstand push-ups                                                                                                   | 16.4<br>(repetitions)     | 17.4<br>(repetitions)     |                       |
| 20-minute time limit                   | <i>Alternate the following:</i><br>Dumbbell snatches (50lbs / 35lbs) x 10-20-30-40-50 repetitions<br>15 x Burpee box jump-overs (24" / 20")                                                                                              | 17.1 (TTC or repetitions) | 21.2 (TTC or repetitions) |                       |
| 9-minute time limit                    | <i>Complete 21-15-9 repetitions of:</i><br>Deadlifts (225lbs / 155lbs)<br>Handstand push-ups<br><i>Then complete 21-15-9 repetitions of:</i><br>Deadlifts (315lbs / 205lbs)<br>Handstand walk (50')                                      | 18.4 (TTC or repetitions) | 20.3 (TTC or repetitions) |                       |

592 Notes: AMRAP = 'as many repetitions as possible'; TTC = time to completion

593 **Table 2. Exercise movement standards.**

| Exercise              | Movement standards                                                                                                                                                                                                                                                                                                                                                                                                                                                                                                             |
|-----------------------|--------------------------------------------------------------------------------------------------------------------------------------------------------------------------------------------------------------------------------------------------------------------------------------------------------------------------------------------------------------------------------------------------------------------------------------------------------------------------------------------------------------------------------|
| Bar-facing burpees    | Athlete begins standing perpendicular to and facing the barbell, and then drops to the floor, ensuring that the chest and thighs touch the ground. The athlete then lifts themselves to jump over the barbell from both feet and land on both feet. The next repetition will begin on the opposite side facing the barbell.                                                                                                                                                                                                    |
| Burpee box jump-overs | Athlete begins standing perpendicular and facing the box, and then drops to the floor, ensuring that the chest and thighs touch the ground. The athlete then lifts themselves to jump onto the box and drop to the floor on its opposite side, or jump completely over (not around) the box. A two-foot jump and landing is required, and then next repetition begins on the opposite side facing the box.                                                                                                                     |
| Calorie rowing        | The monitor on a Concept2™ rower must be set to zero at the beginning of each row; it may be reset by the athlete or judge. The athlete must remain seated throughout the entire row until the targeted calories or distance may be clearly read on the monitor.                                                                                                                                                                                                                                                               |
| Chest-to-bar pull-ups | Athletes begin hanging from a standard pull-up bar with arms extended and feet off the ground and then pull themselves vertically so that their chest touches the bar before returning to the start position. “Kipping” or “butterfly” techniques are acceptable so long as the arms return to full extension at the bottom of each repetition.                                                                                                                                                                                |
| Deadlifts             | Using a traditional stance (i.e., hands outside the knees), athletes pick up a loaded barbell from the floor until their hips and knees reach full extension with the head and shoulders behind the bar and arms straight throughout the movement.                                                                                                                                                                                                                                                                             |
| Double-unders         | Using a jump rope, the athlete must spin the rope forward so that it completely passes under the feet twice during a single jump.                                                                                                                                                                                                                                                                                                                                                                                              |
| Dumbbell snatches     | Athlete lift the dumbbell from the ground using one motion to finish with it directly overhead with arms, hips, and knees fully extended. The athlete then lowers the dumbbell so that both of its heads touch the ground. Athletes must alternate arms after each repetition and the non-lifting hand and arm may not be in contact with the body during the repetition.                                                                                                                                                      |
| Handstand push-ups    | All repetitions begin and end at the top of a handstand with the arms and hips extended, with their hands within the pre-marked square on the ground, and heels contacting the wall at or above the pre-marked foot line. Athletes lower themselves so their head makes contact with the ground before returning to the starting position; “kipping” is permitted.                                                                                                                                                             |
| Handstand walk        | Using a walking lane marked in 5-ft segments, athletes kick up with both hands completely behind the segment marking line. They must walk forward on their hands, while supporting the rest of their body in the air, until their hands completely pass the next segment line.                                                                                                                                                                                                                                                 |
| Muscle-ups            | Athletes begin hanging from a standard pull-up bar with arms extended and feet off the ground and then pull themselves vertically so that their arms are extended in a support position above the bar, with shoulders over or slightly in front of the bar. “Kipping” is permitted, but pull-overs, rolls to support, and glide kips are not, and no portion of the foot may rise above the lowest part of the bar during the kip.                                                                                             |
| Overhead squats       | The athlete lifts the loaded barbell from the floor to overhead with the hips, knees, and arms fully extended, and the bar directly over the body's midline. The athlete maintains the overhead barbell position as they lower their body into a full squat (i.e., crease of the hip clearly passes below the top of the knees) before returning to the start position. A full squat snatch is permitted on the first repetition.                                                                                              |
| Power snatches        | The athlete lifts the loaded barbell from the ground using one motion to bring it overhead with the hips, knees, and arms in full extension and the barbell directly over the body's midline. The athlete then lowers the barbell so that both sides' plates touch the ground; bouncing is prohibited.                                                                                                                                                                                                                         |
| Squat cleans          | The athlete lifts the loaded barbell from the ground, extending their ankles, knees, and hips. The athlete must receive the barbell in the front rack position either while in a full squat (i.e., (i.e., crease of the hip clearly passes below the top of the knees) or higher (i.e., power clean) and then lowering themselves into the full squat (i.e., power clean to front squat). From the full squat, the athlete must stand with their hips and knees are fully extended, before returning the barbell to the floor. |

## Sex differences in repeated CFO workouts 27

|                 |                                                                                                                                                                                                                                                                                                                                                                      |
|-----------------|----------------------------------------------------------------------------------------------------------------------------------------------------------------------------------------------------------------------------------------------------------------------------------------------------------------------------------------------------------------------|
| Thrusters       | A loaded barbell is picked up from the floor into the front rack position and the athlete descends to a full squat (i.e., crease of the hip clearly passes below the top of the knees), returns to the starting position, and then immediately progresses into an overhead press with knees, hips, and arms at full extension with the barbell overhead.             |
| Toes-to-bar     | Athletes begin hanging from a standard pull-up bar with arms extended and feet off the ground before bringing their heels behind the bar and then swinging both feet simultaneously forward and up to touch the bar.                                                                                                                                                 |
| Wall ball shots | A medicine ball is picked up from the floor into the front rack position and the athlete descends to a full squat (i.e., crease of the hip clearly passes below the top of the knees), returns to the starting position, and then immediately progresses into a shooting motion to throw the ball so that its center hits a target at or above the specified height. |

Sex differences in repeated CFO workouts 28

595 **Table 3. Case selection and sample characteristics.**

| Competition |       | Cases   |              |          | Age (y)              | Overall Rank                    |
|-------------|-------|---------|--------------|----------|----------------------|---------------------------------|
| year        | class | Initial | Met criteria | Included | mean ± SD (range)    | mean ± SD (range)               |
| 2011        | Women | 4,506   | 3,046        | 500      | 30.2 ± 6.3 (18 - 46) | 2,055 ± 1,234 (7 - 4,475)       |
|             | Men   | 8,621   | 7,046        | 500      | 29.7 ± 6.2 (18 - 47) | 4,121 ± 2,454 (15 - 8,612)      |
| 2012        | Women | 14,217  | 8,621        | 500      | 30.9 ± 5.8 (18 - 44) | 4,591 ± 2,843 (18 - 11,976)     |
|             | Men   | 25,027  | 18,873       | 500      | 30.7 ± 5.6 (18 - 44) | 9,766 ± 5,799 (38 - 21,842)     |
| 2013        | Women | 32,643  | 14,144       | 500      | 31.7 ± 6.8 (18 - 54) | 7,987 ± 5,320 (29 - 24,946)     |
|             | Men   | 52,169  | 36,808       | 500      | 31.5 ± 6.8 (18 - 54) | 19,123 ± 11,424 (74 - 44,964)   |
| 2014        | Women | 52,076  | 36,863       | 500      | 30.9 ± 7.1 (18 - 54) | 14,680 ± 9,402 (54 - 41,964)    |
|             | Men   | 80,284  | 63,828       | 500      | 31.6 ± 7.1 (19 - 54) | 32,598 ± 19,038 (128 - 70,200)  |
| 2015        | Women | 108,764 | 7,802        | 500      | 29.3 ± 5.9 (17 - 53) | 4,995 ± 3,849 (16 - 22,305)     |
|             | Men   | 153,272 | 45,615       | 500      | 30.4 ± 6.7 (18 - 50) | 24,583 ± 15,474 (92 - 65,527)   |
| 2016        | Women | 130,154 | 16,372       | 500      | 30.3 ± 6.3 (18 - 51) | 9,856 ± 7,014 (33 - 35,206)     |
|             | Men   | 178,510 | 53,920       | 500      | 31.1 ± 6.9 (18 - 52) | 28,340 ± 17,430 (108 - 76,861)  |
| 2017        | Women | 159,563 | 36,721       | 500      | 31.9 ± 6.8 (18 - 52) | 20,271 ± 13,222 (74 - 62,666)   |
|             | Men   | 214,519 | 84,669       | 500      | 32.2 ± 7.0 (18 - 52) | 49,020 ± 32,240 (170 - 136,725) |
| 2018        | Women | 171,976 | 31,007       | 500      | 31.7 ± 7.0 (18 - 51) | 17,955 ± 12,368 (63 - 62,929)   |
|             | Men   | 227,562 | 78,268       | 500      | 32.5 ± 7.0 (18 - 53) | 44,752 ± 29,760 (157 - 137,436) |
| 2019        | Women | 146,363 | 39,895       | 500      | 32.5 ± 7.2 (18 - 54) | 22,558 ± 15,109 (80 - 72,134)   |
|             | Men   | 195,562 | 87,197       | 500      | 33.3 ± 7.4 (18 - 54) | 50,950 ± 33,569 (174 - 140,343) |
| 2020        | Women | 94,157  | 20,965       | 500      | 33.3 ± 7.8 (18 - 53) | 12,372 ± 8,793 (42 - 45,870)    |
|             | Men   | 133,874 | 51,394       | 500      | 33.7 ± 7.1 (18 - 53) | 29,343 ± 19,410 (103 - 90,568)  |
| 2021        | Women | 108,641 | 42,799       | 500      | 33.6 ± 7.5 (18 - 54) | 22,426 ± 13,470 (91 - 53,507)   |
|             | Men   | 137,464 | 73,750       | 500      | 33.1 ± 7.1 (18 - 54) | 21,708 ± 12,537 (86 - 43,846)   |

597 **Table 4. Comparisons between age, overall rank, workout rank, and workout percent rank in repeated CFO workouts.**

|                           |        | Overall     |              |                  |                   | Workout          |                   |              |               |
|---------------------------|--------|-------------|--------------|------------------|-------------------|------------------|-------------------|--------------|---------------|
|                           |        | Age         |              | Rank             |                   | Rank             |                   | Percent Rank |               |
|                           |        | Women       | Men          | Women            | Men               | Women            | Men               | Women        | Men           |
| 11.1 vs. 14.1             | Year 1 | 30.2 ± 6.3  | 29.7 ± 6.2   | 2,055 ± 1,234    | 4,121 ± 2,454*    | 2,579 ± 1,782    | 5,550 ± 3,694*    | 49.6 ± 28.9  | 49.6 ± 28.9   |
|                           | Year 2 | 30.9 ± 7.1  | 31.6 ± 7.1#  | 14,680 ± 9,402#  | 32,598 ± 19,038*# | 20,343 ± 15,373# | 45,083 ± 29,251*# | 49.6 ± 28.9  | 49.6 ± 28.9   |
| 11.6 vs. 12.5<br>vs. 18.5 | Year 1 | 30.2 ± 6.3  | 29.7 ± 6.2   | 2,055 ± 1,234    | 4,121 ± 2,454*    | 2,069 ± 1,259    | 4,076 ± 2,557*    | 49.3 ± 28.9  | 49.2 ± 28.9   |
|                           | Year 2 | 30.9 ± 5.8  | 30.7 ± 5.6#  | 4,591 ± 2,843#   | 9,766 ± 5,799*#   | 4,683 ± 2,931#   | 9,707 ± 5,895*#   | 49.3 ± 28.9  | 49.3 ± 29.0   |
|                           | Year 3 | 31.7 ± 7.0† | 32.5 ± 7.0#  | 17,955 ± 12,368# | 44,752 ± 29,760*# | 19,959 ± 14,193# | 47,381 ± 32,522*# | 49.2 ± 29.1  | 49.2 ± 29.0   |
| 12.4 vs. 13.3             | Year 1 | 30.9 ± 5.8  | 30.7 ± 5.6   | 4,591 ± 2,843    | 9,766 ± 5,799*    | 4,311 ± 3,572    | 10,154 ± 6,084*   | 42.3 ± 25.4  | 47.7 ± 28.9 * |
|                           | Year 2 | 31.7 ± 6.8  | 31.5 ± 6.8   | 7,987 ± 5,320#   | 19,123 ± 11,424*# | 9,943 ± 6,922#   | 22,347 ± 13,810*# | 40.7 ± 26.0  | 48.2 ± 28.8   |
|                           |        |             | #            |                  |                   |                  |                   |              |               |
| 14.2 vs. 15.2             | Year 1 | 30.9 ± 7.1  | 31.6 ± 7.1 * | 14,680 ± 9,402   | 32,598 ± 19,038*  | 15,582 ± 9,582   | 40,097 ± 24,873 * | 49.2 ± 29.1  | 49.5 ± 29.0   |
|                           | Year 2 | 29.3 ± 5.9  | 30.4 ± 6.7   | 4,995 ± 3,849#   | 24,583 ± 15,474*# | 6,310 ± 5,449    | 30,974 ± 21,526   | 49.3 ± 29.1  | 49.4 ± 29.1   |
|                           |        |             | #            |                  |                   |                  | #                 |              |               |
| 14.5 vs. 16.5             | Year 1 | 30.9 ± 7.1  | 31.6 ± 7.1 * | 14,680 ± 9,402   | 32,598 ± 19,038*  | 15,952 ± 10,846  | 32,977 ± 19,534 * | 49.9 ± 28.9  | 49.9 ± 28.9   |
|                           | Year 2 | 30.3 ± 6.3  | 31.1 ± 6.9   | 9,856 ± 7,014#   | 28,340 ± 17,430*# | 13,159 ± 10,463  | 31,034 ± 20,961   | 49.9 ± 28.9  | 49.9 ± 28.9   |
|                           |        |             | #            |                  |                   |                  | #                 |              |               |
| 16.2 vs. 19.2             | Year 1 | 30.3 ± 6.3  | 31.1 ± 6.9 * | 9,856 ± 7,014    | 28,340 ± 17,430*  | 11,820 ± 8,301   | 33,667 ± 21,619*  | 48.5 ± 29.1  | 48.2 ± 29.3   |
|                           | Year 2 | 32.5 ± 7.2  | 33.3 ± 7.4   | 22,558 ± 15,109# | 50,950 ± 33,569*# | 25,424 ± 16,165# | 55,081 ± 33,401*# | 49.0 ± 28.8  | 48.7 ± 28.9   |
|                           |        |             | #            |                  |                   |                  |                   |              |               |
| 16.4 vs. 17.4             | Year 1 | 30.3 ± 6.3  | 31.1 ± 6.9   | 9,856 ± 7,014    | 28,340 ± 17,430*  | 12,721 ± 11,796  | 33,985 ± 24,139*  | 49.1 ± 29.1  | 49.1 ± 29.1   |
|                           | Year 2 | 31.9 ± 6.8  | 32.2 ± 7.0   | 20,271 ± 13,222# | 49,020 ± 32,240*# | 24,992 ± 18,278# | 53,371 ± 34,233*# | 48.6 ± 29.6  | 49.0 ± 29.3   |
|                           |        |             | #            |                  |                   |                  |                   |              |               |
| 17.1 vs. 21.2             | Year 1 | 31.9 ± 6.8  | 32.2 ± 7.0   | 20,271 ± 13,222  | 49,020 ± 32,240*  | 29,551 ± 21,148  | 62,539 ± 41,623*  | 49.8 ± 29.0  | 49.8 ± 29.0   |
|                           | Year 2 | 33.6 ± 7.5  | 33.1 ± 7.1   | 22,426 ± 13,470# | 21,708 ± 12,537*# | 26,306 ± 16,692# | 25,240 ± 16,729*# | 49.8 ± 29.0  | 49.9 ± 28.9   |
|                           |        |             | #            |                  |                   |                  |                   |              |               |

Sex differences in repeated CFO workouts 30

|               |        |            |            |                 |                   |                 |                   |             |             |
|---------------|--------|------------|------------|-----------------|-------------------|-----------------|-------------------|-------------|-------------|
| 18.4 vs. 20.3 | Year 1 | 31.7 ± 7.0 | 32.5 ± 7.0 | 17,955 ± 12,368 | 44,752 ± 29,760*  | 17,499 ± 10,649 | 45,516 ± 28,014*  | 49.1 ± 28.9 | 49.2 ± 29.1 |
|               | Year 2 | 33.3 ± 7.8 | 33.7 ± 7.1 | 12,372 ± 8,793# | 29,343 ± 19,410*# | 12,450 ± 7,282# | 30,647 ± 18,397*# | 49.1 ± 29.1 | 49.2 ± 29.0 |
|               |        |            | #          |                 |                   |                 |                   |             |             |

598

599 Note: \* = Significant (p < 0.05) difference between men and women; # = Significant (p < 0.05) difference from previous year(s); † = Significant (p < 0.05)

600 difference between 11.6 and 18.5

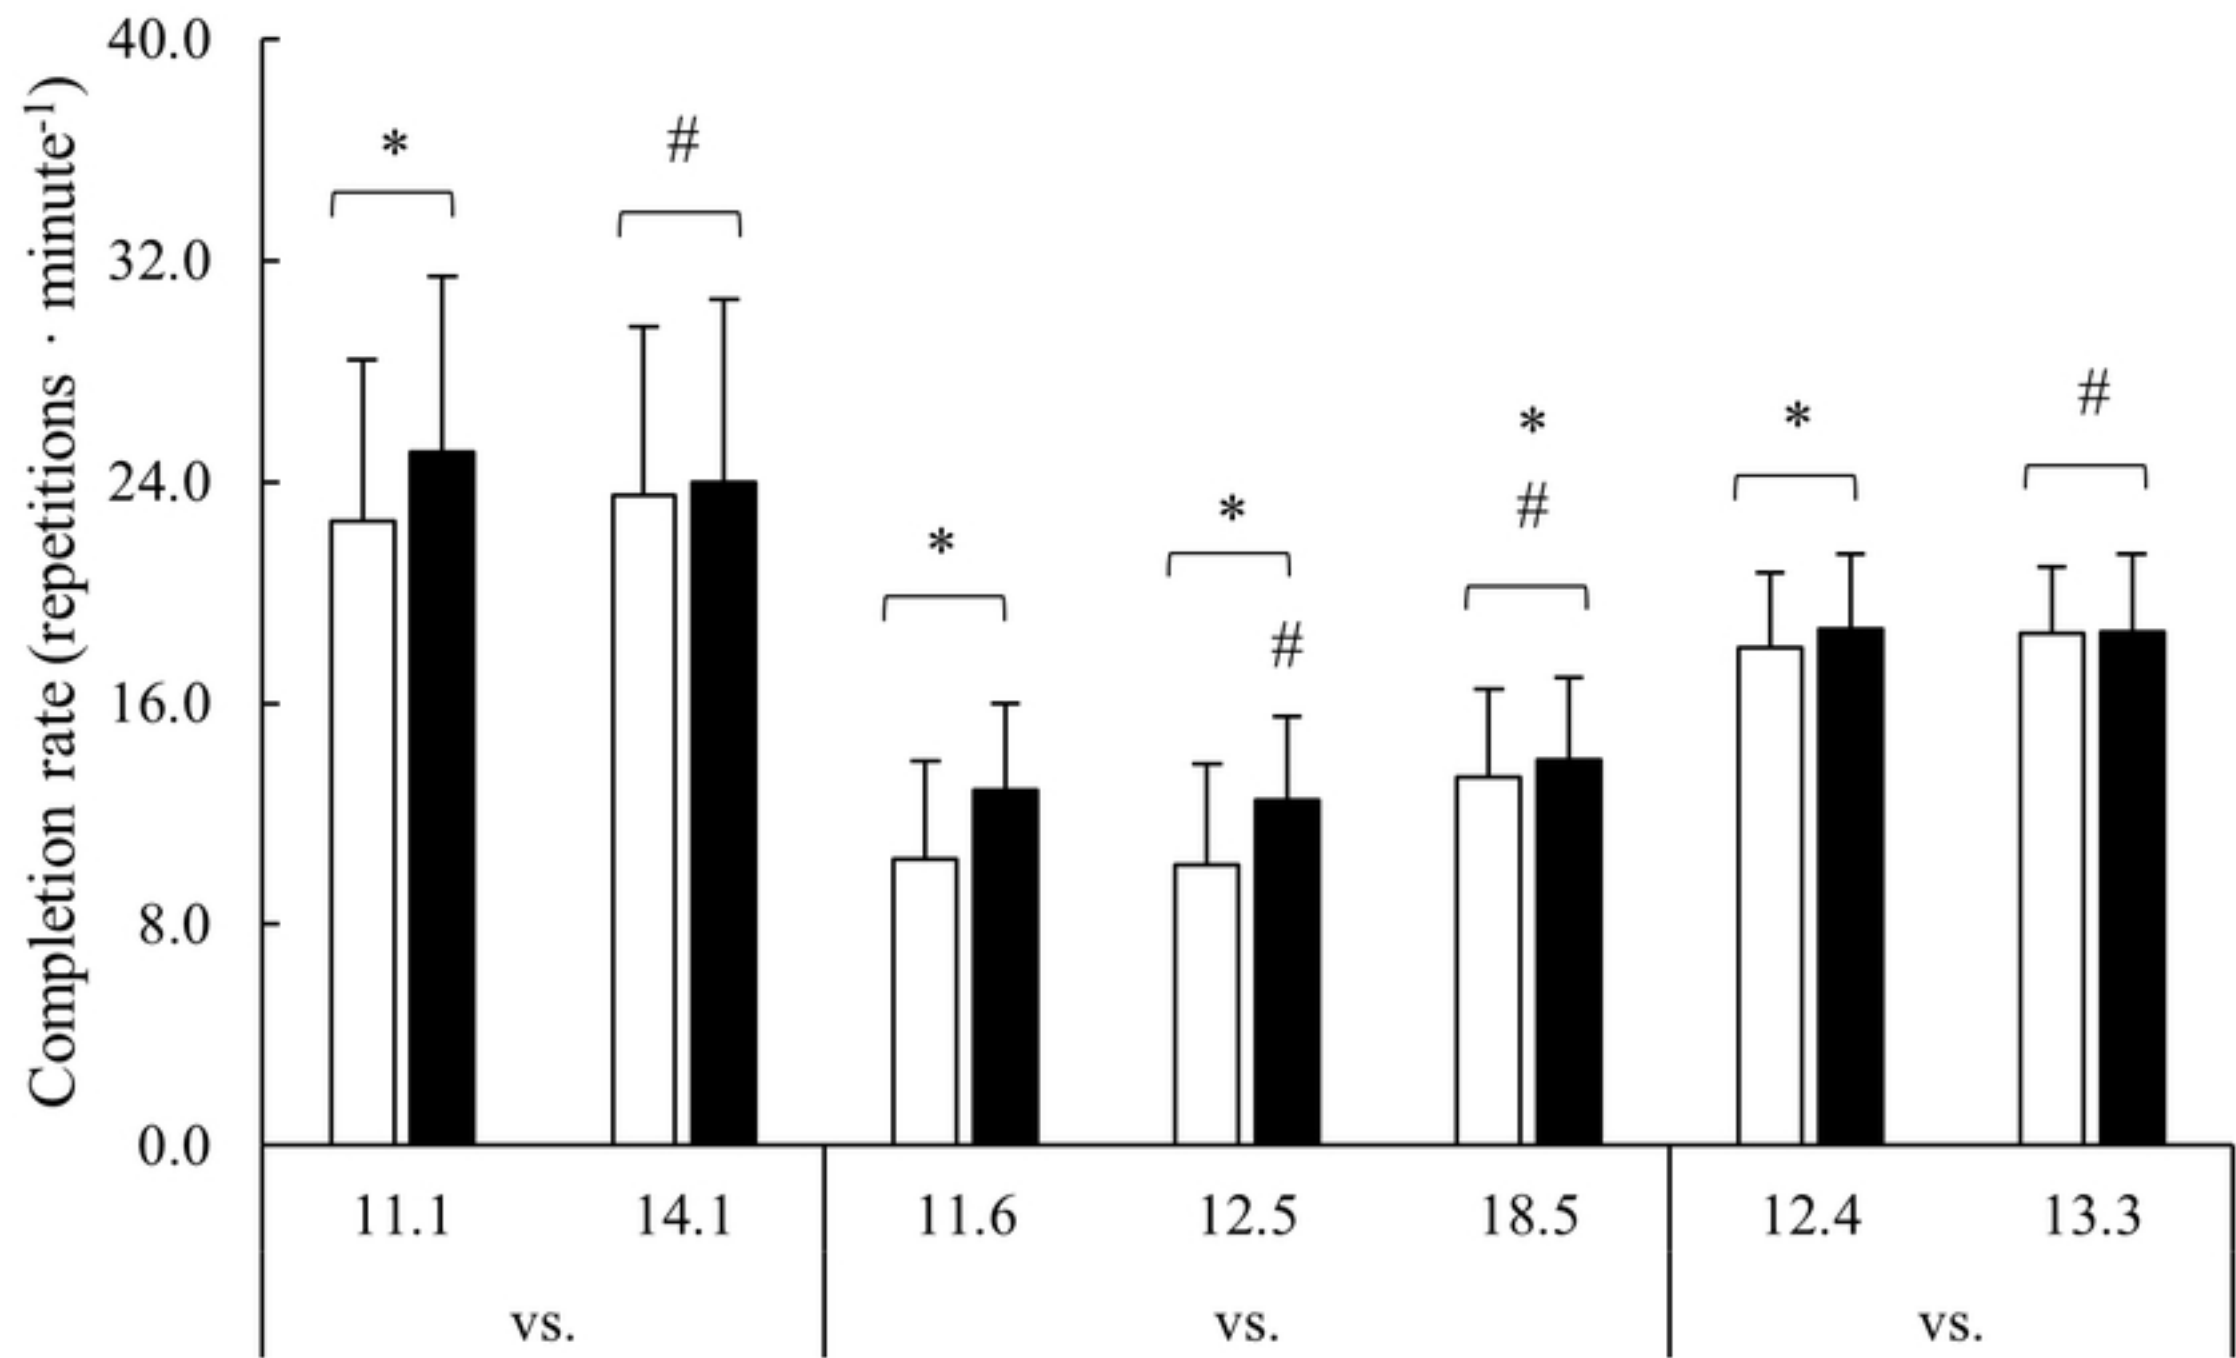

Figure 1a



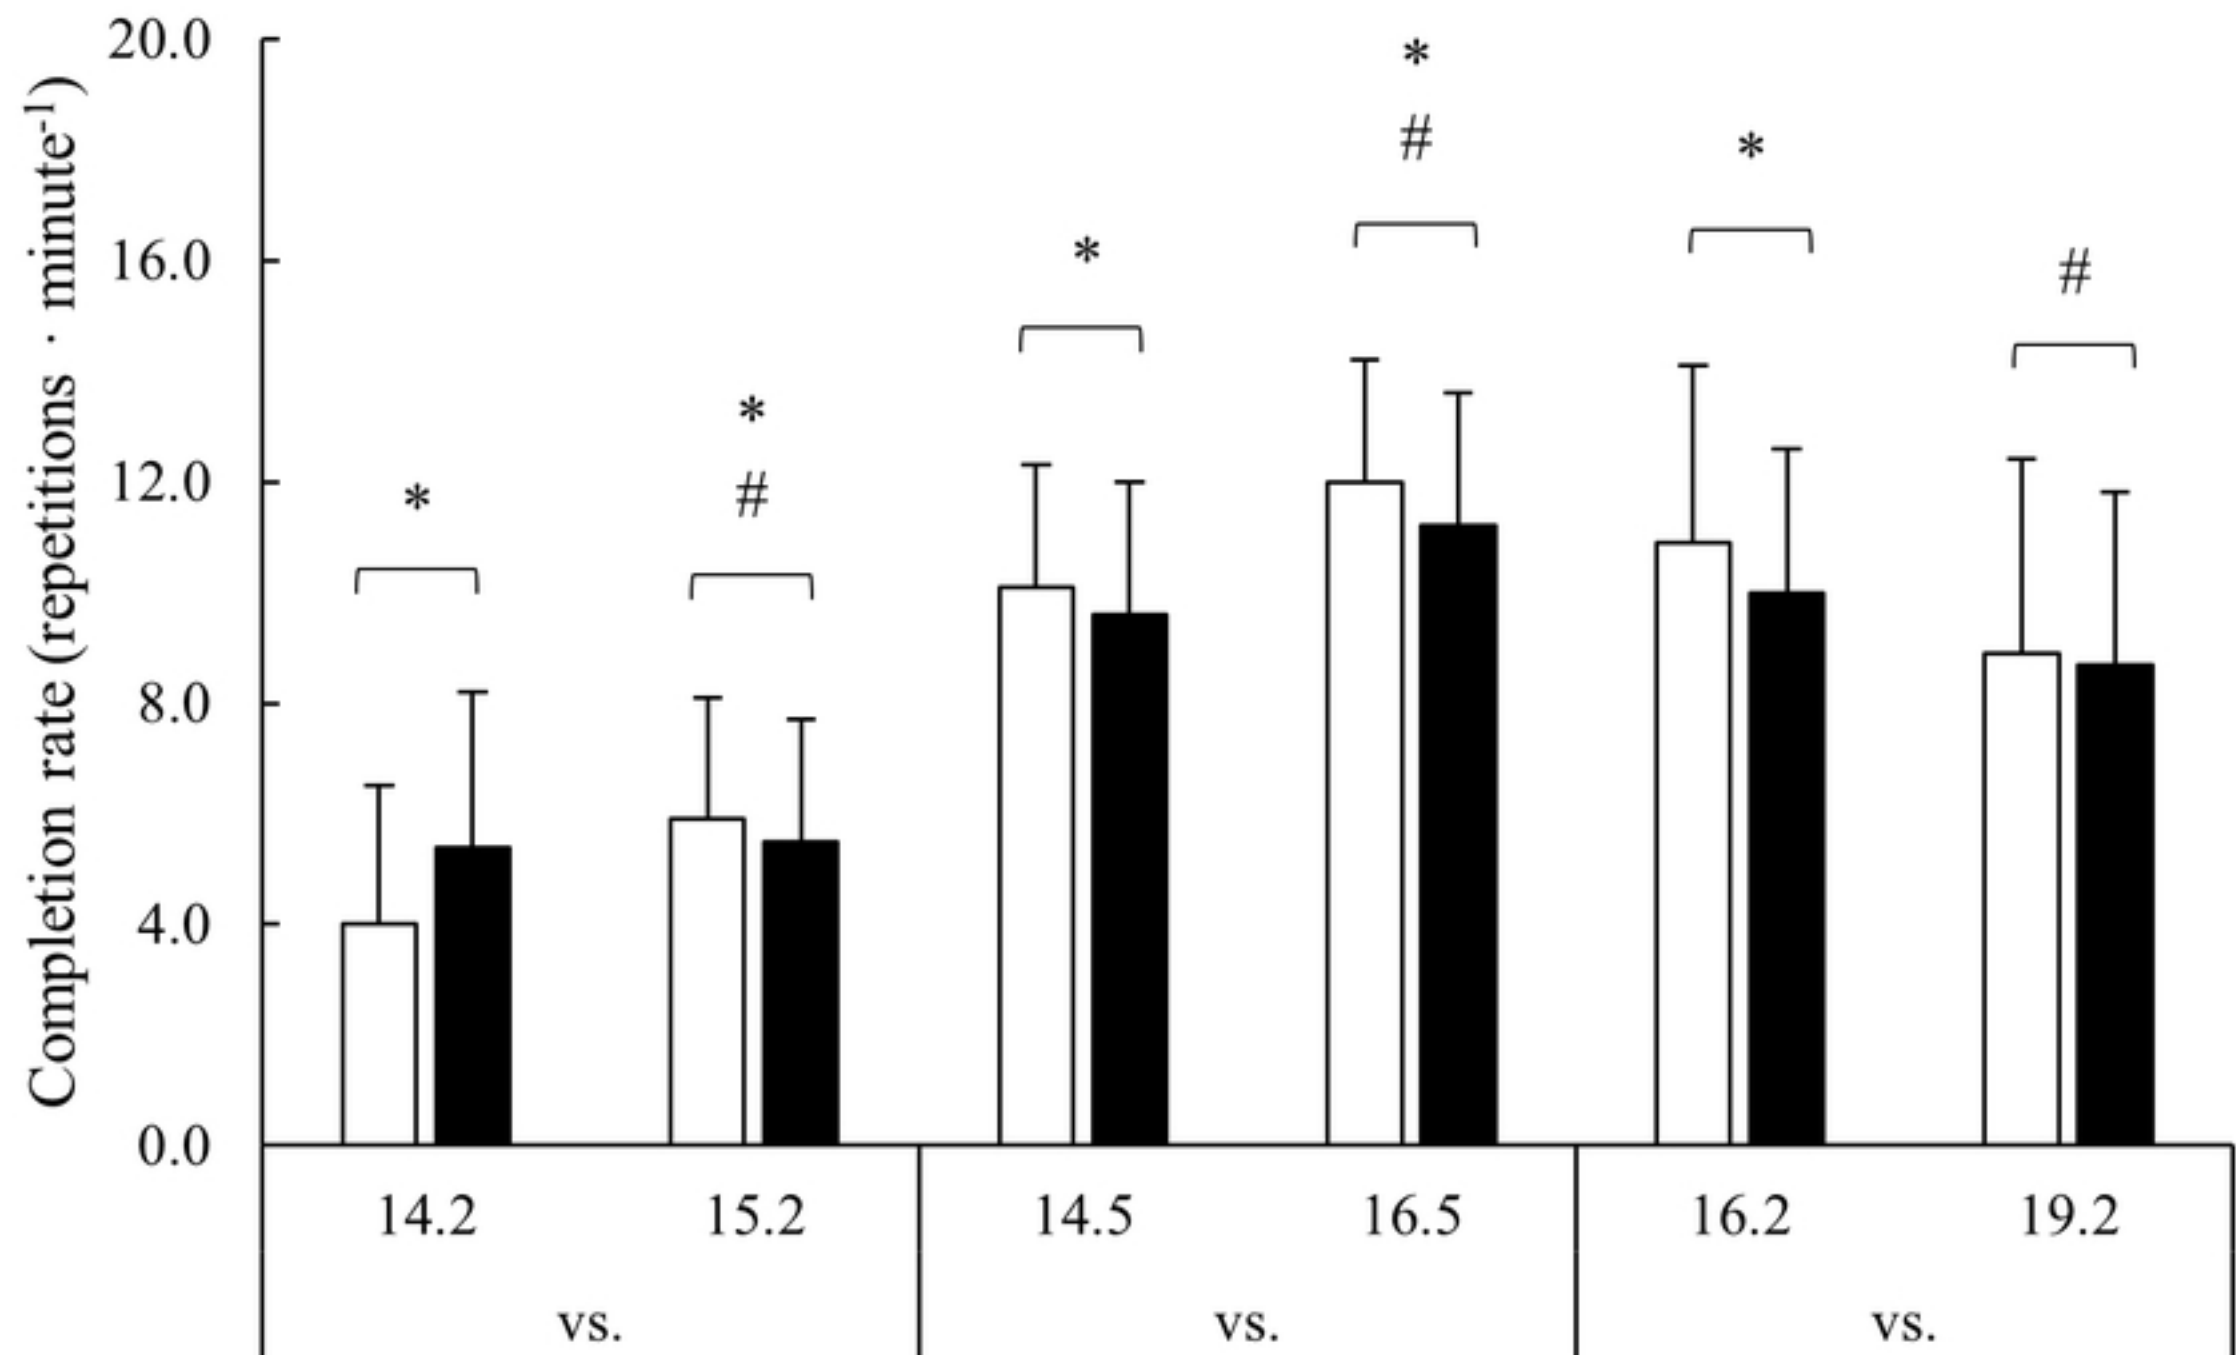

Figure 1b

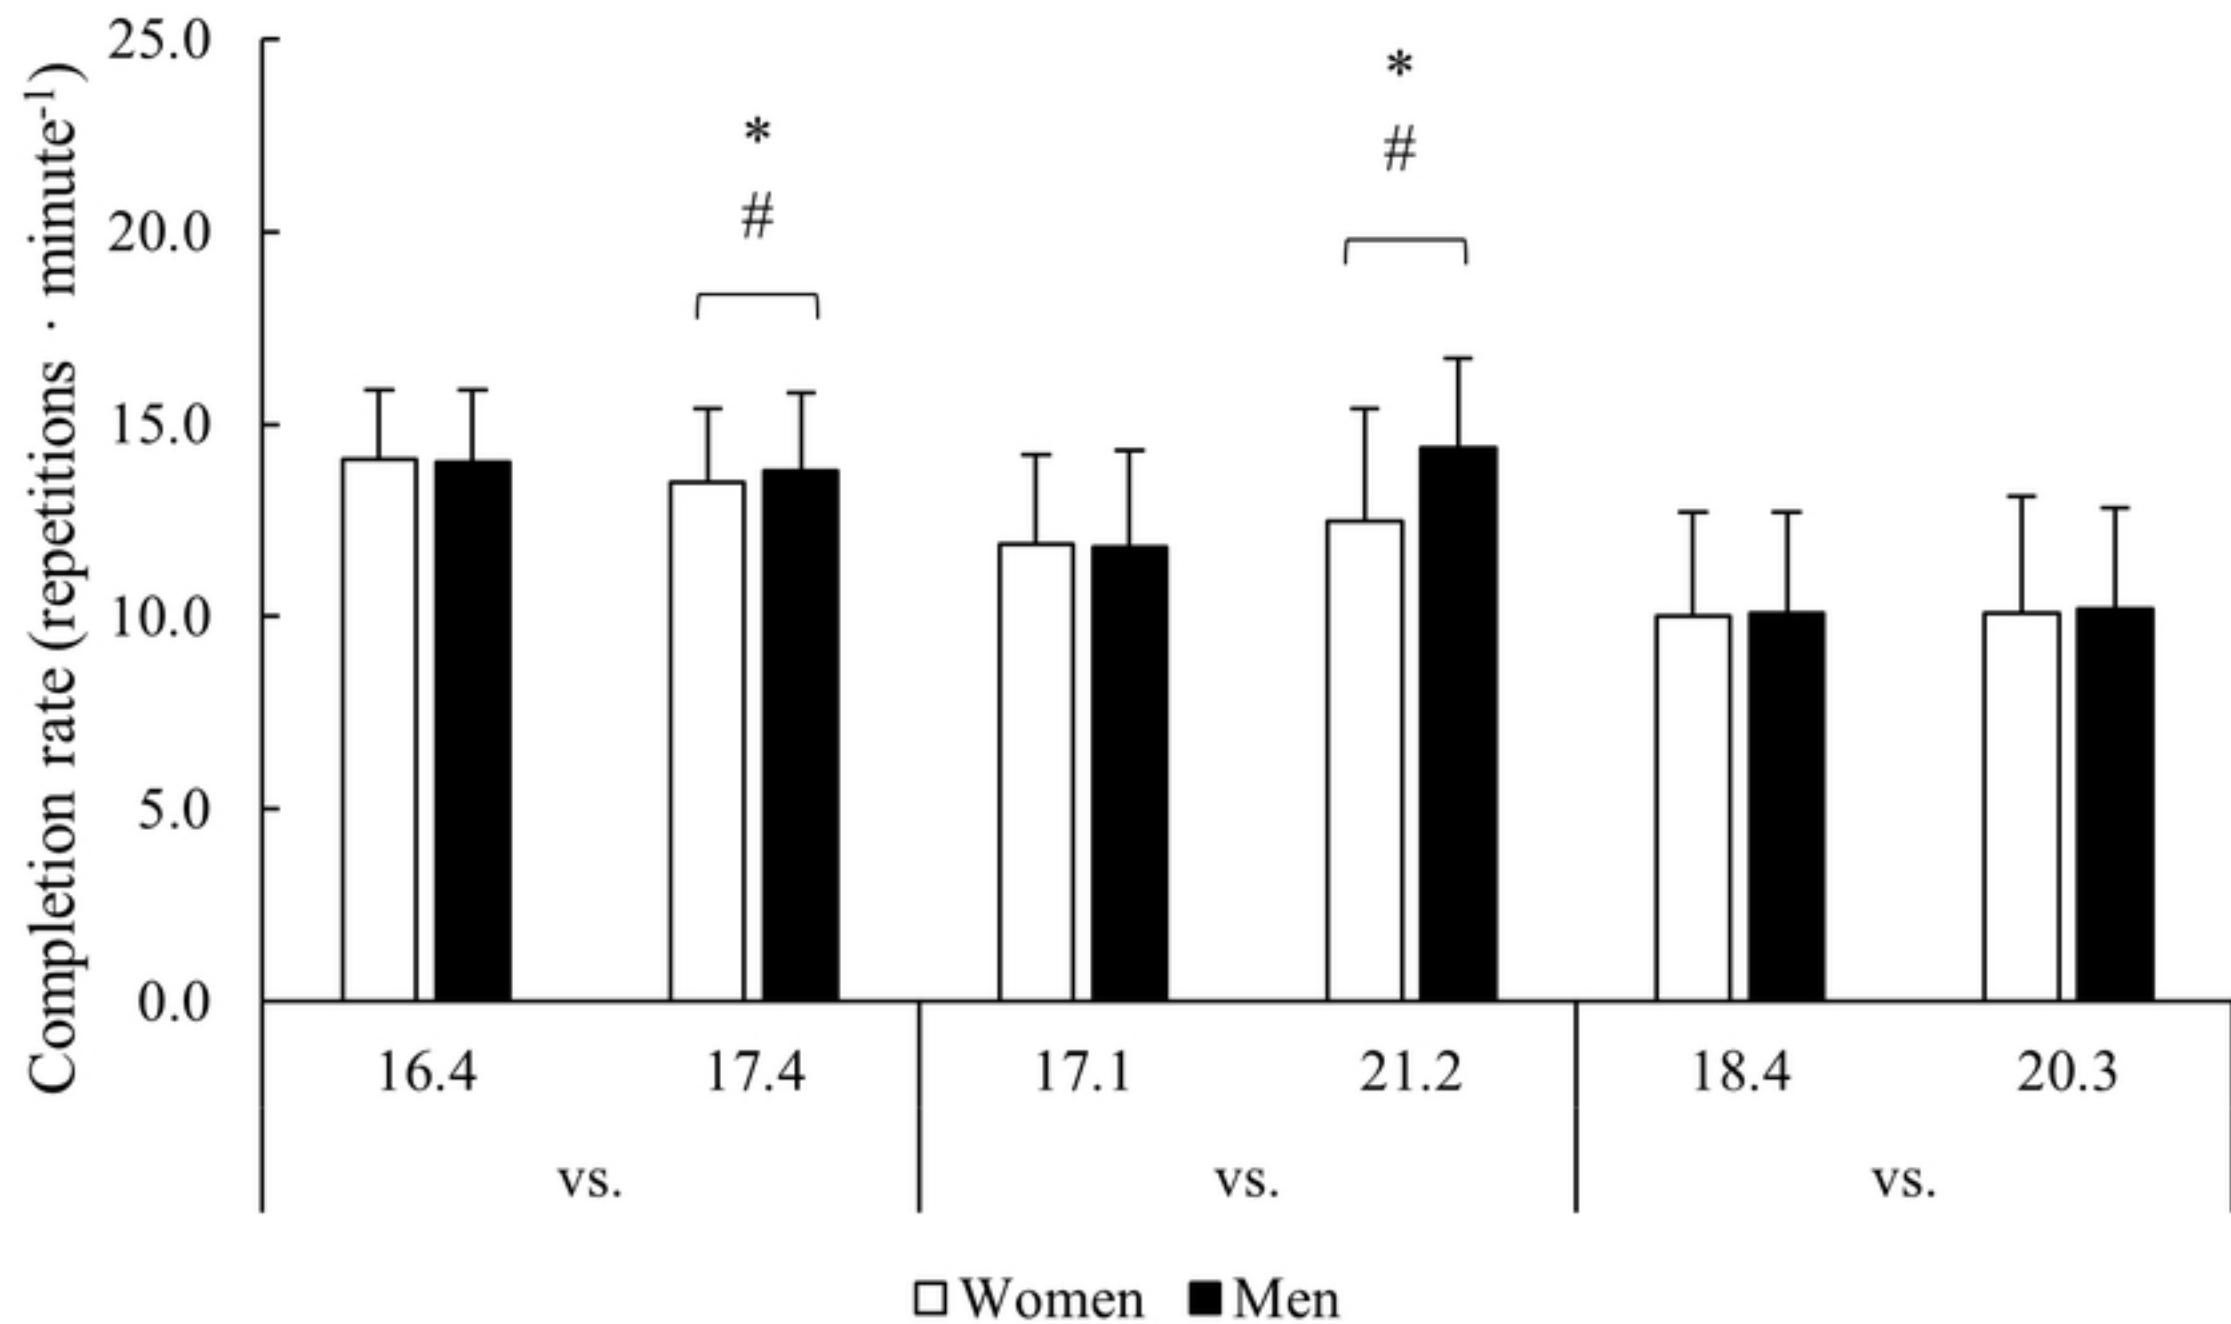

Figure 1c
